# Supplementary material
Source: PubMed Central journal article supplement (PMC6594049)
Supplement: NIHMS978168-supplement-2.pdf [file NIHMS978168-supplement-2.pdf]

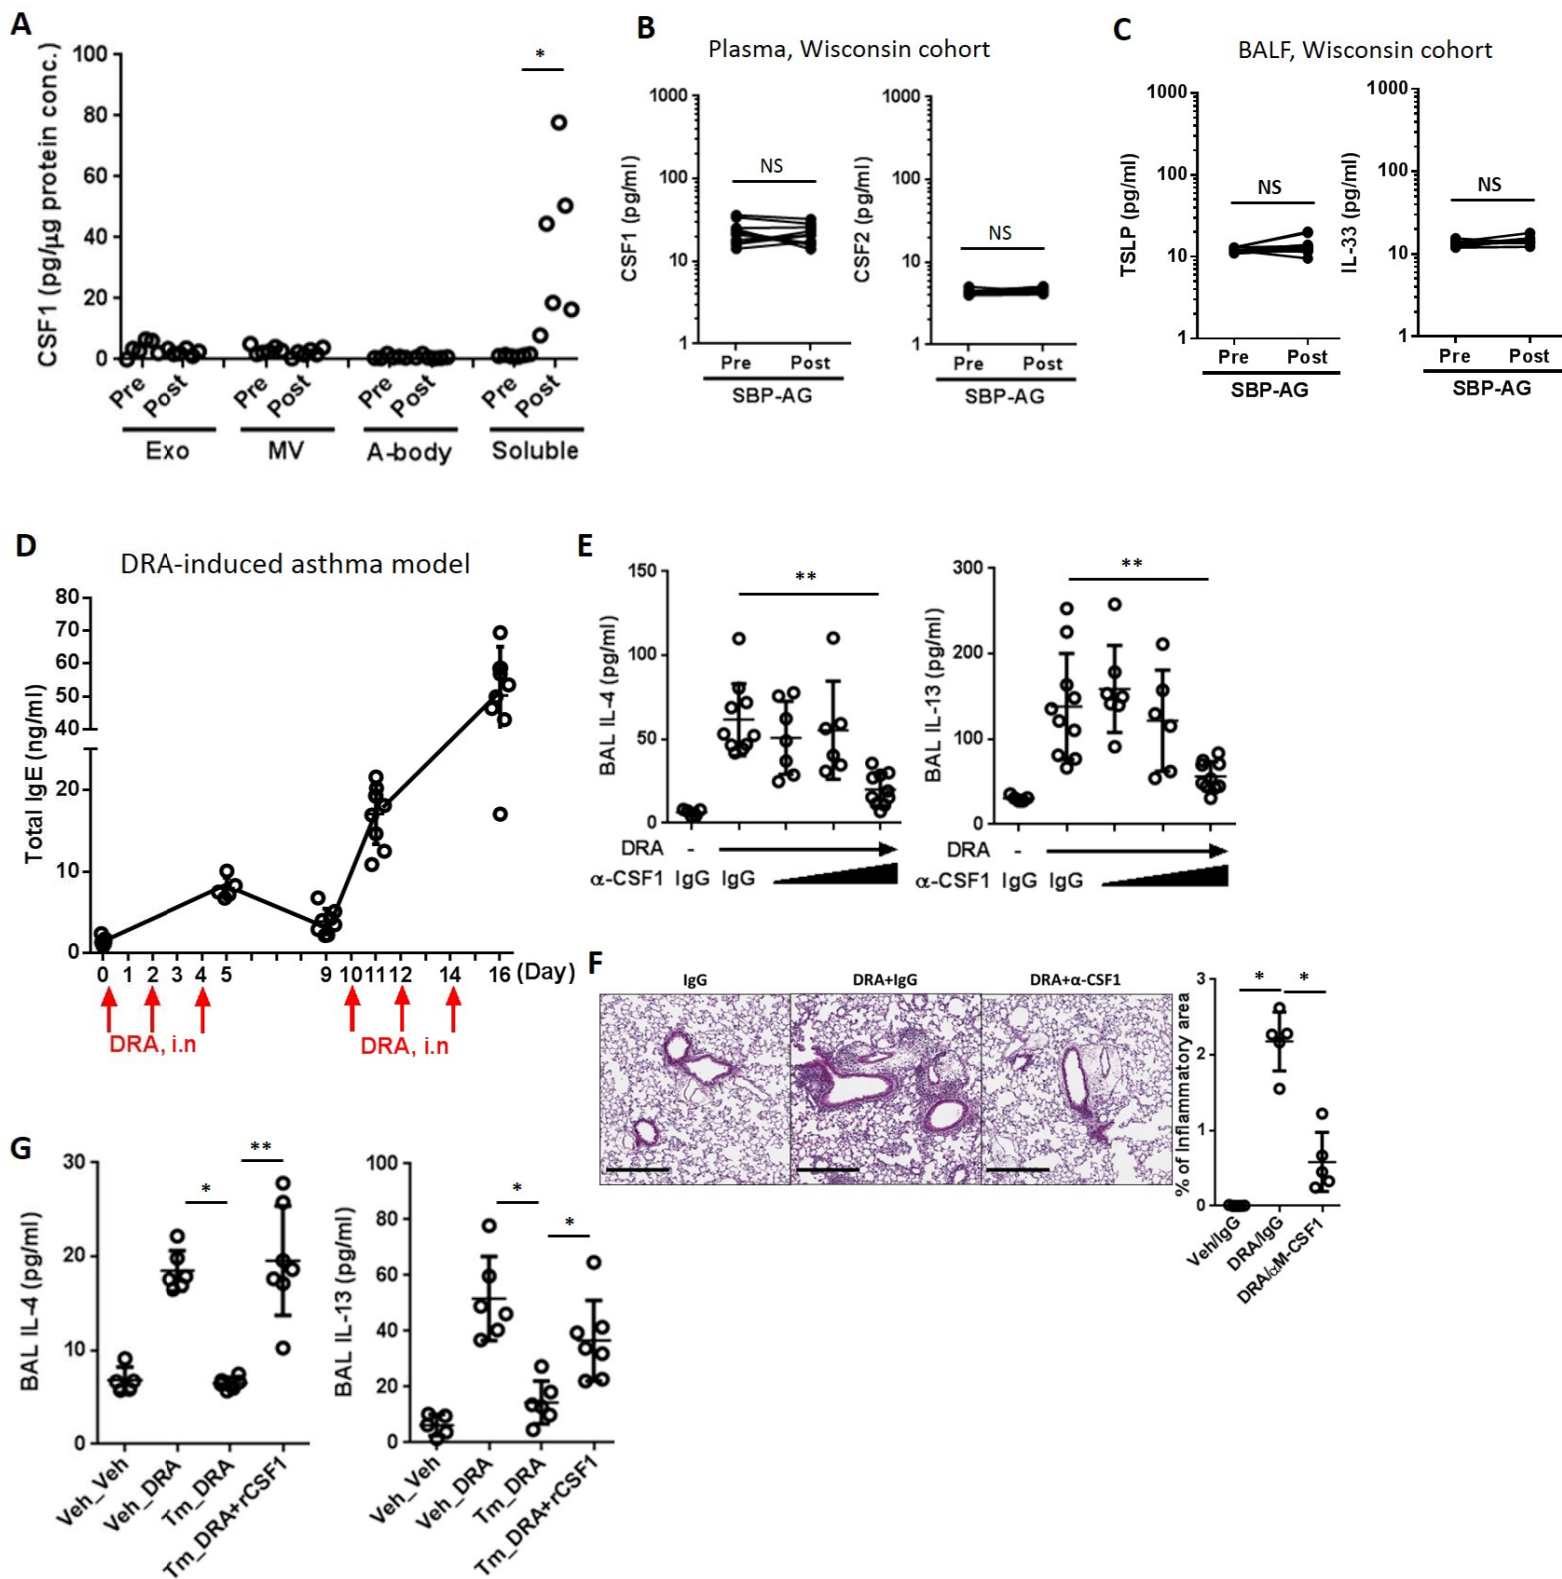

**Figure S1 (related figure 1 & 2). CSF1 promotes allergic inflammation.**

(A) Secretion pattern of CSF1 in the BAL fluids of patients with mild asthma enrolled in the SBP-AG protocol before (Pre) and at 48 hours after allergen challenge (Post). Exo stands for exosome, MV for microvesicle and A-body for apoptotic body. (B-C) CSF-1 & CSF-2 in plasma and TSLP & IL-33 in human BAL fluids from the Wisconsin cohort, before and 48 hours after SBP-AG challenge. Statistical analysis was by paired-*t* test. (D) The concentration of total serum IgE during the course of DRA asthma model. (E-F) BAL IL-4 & IL-13 and lung histology in the DRA model performed for the CSF-1 neutralizing antibody experiment. Representative images of three groups, isotype control IgG (IgG), DRA with isotype control IgG (DRA+IgG) and DRA with anti-CSF-1 antibody (DRA+aCSF1). The graph on the right shows the percentage area of lung inflammation measured by whole lung digital morphometry as described in Methods. Scale bar; 300 $\mu$ m. (G) BAL IL-4 & IL-13 in the DRA model performed for the CSF-1 reconstitution experiment of *Scg1a1-creERT*; *Csf1<sup>fl/fl</sup>* with and without tamoxifen injection. 10 ng of recombinant CSF-1 (rCSF1) was instilled. Data are representative of two (D-G) independent experiments with similar results. \**p*<.05, NS, not significant.

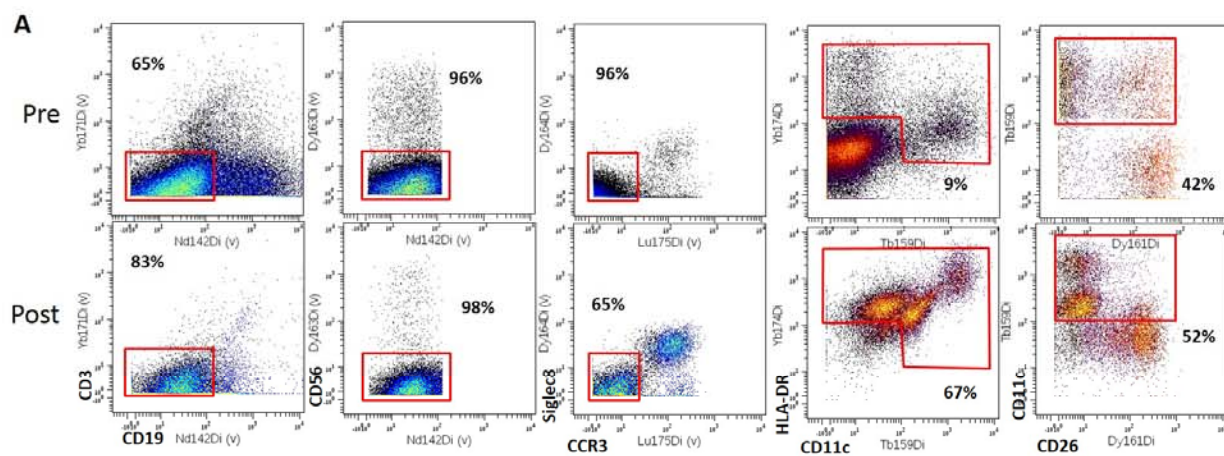

Gating: Live CD3<sup>+</sup>CD19<sup>+</sup>CD56<sup>+</sup>CD193(CCR3)<sup>+</sup>Siglec8<sup>+</sup>HLA-DR<sup>+/+</sup> or CD11c<sup>+</sup> → tSNE

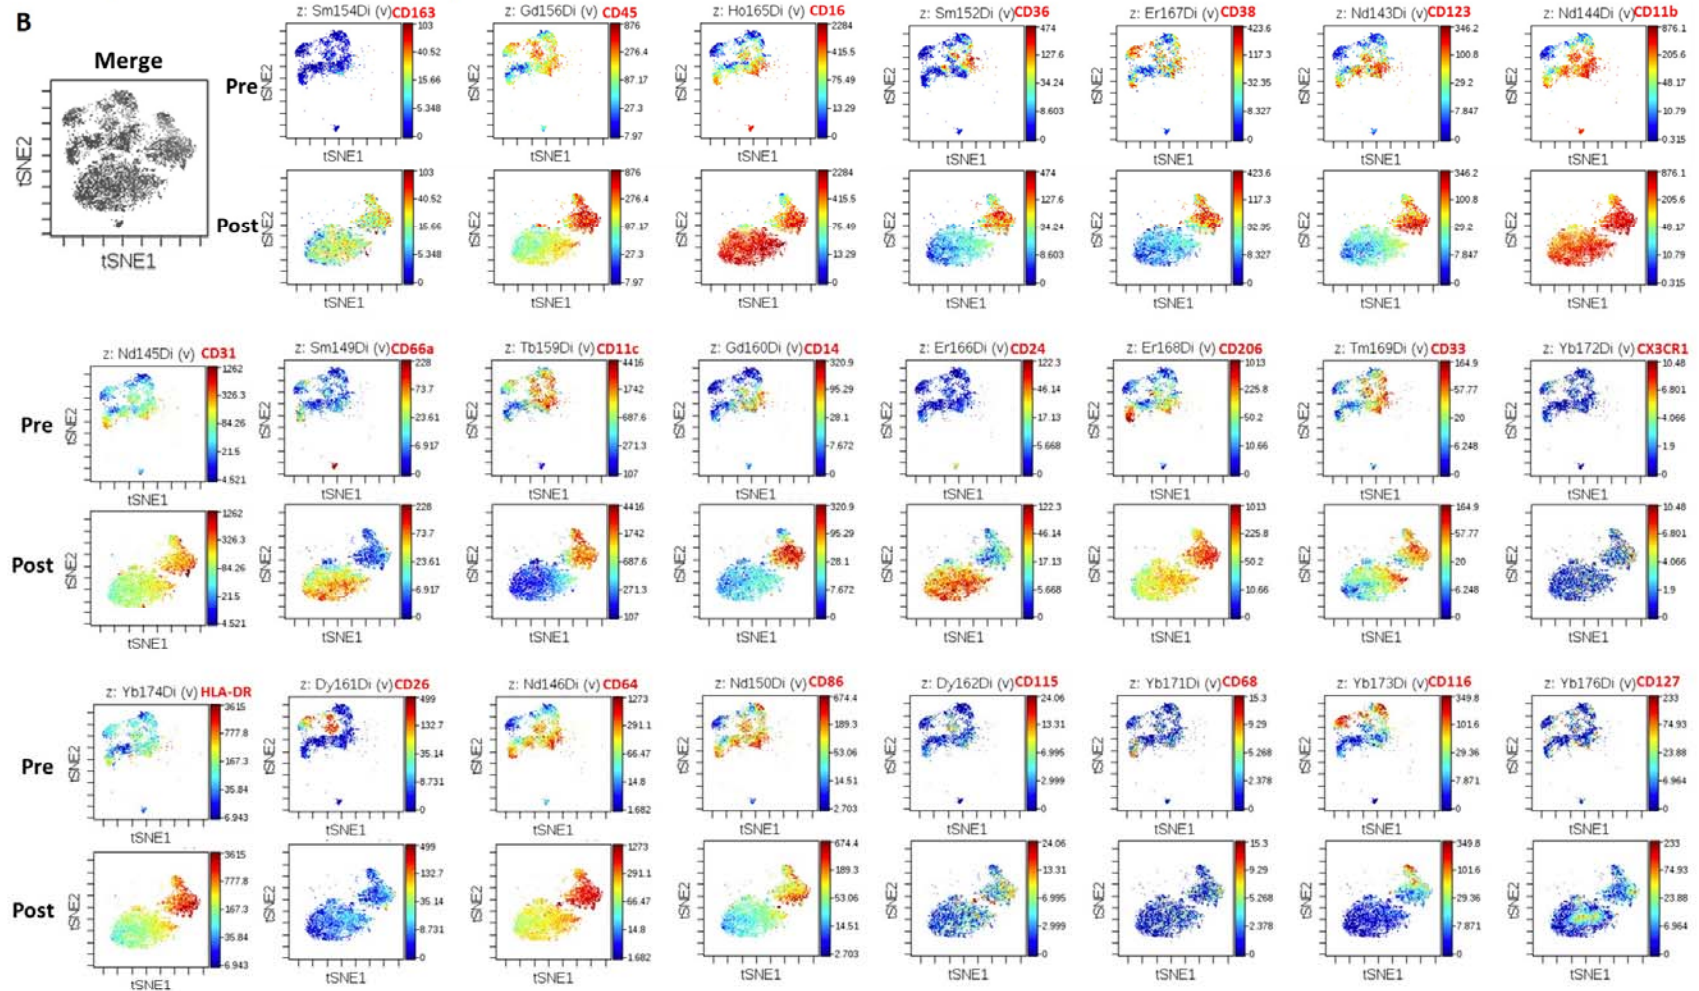

**Figure S2 (related figure 3A). Mass cytometry with human BAL cells**

(A) Gating strategy for mass cytometry with human SBP-AG BAL cells. (B) tSNE data for each markers pre or post allergen challenge

**A** Gating strategy for cDCs and alveolar macrophages in mouse BAL

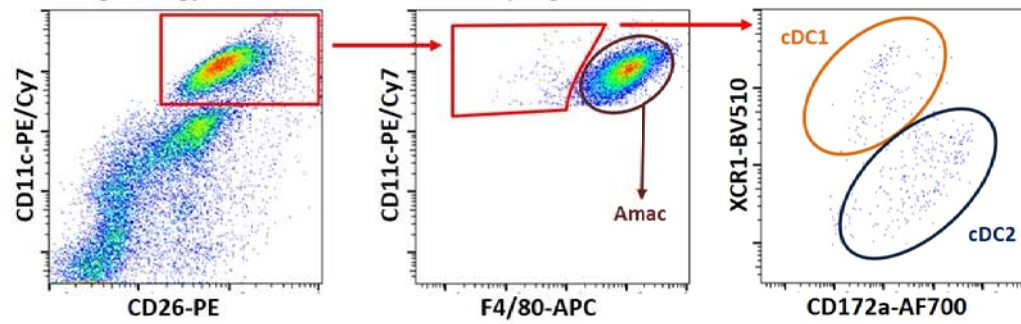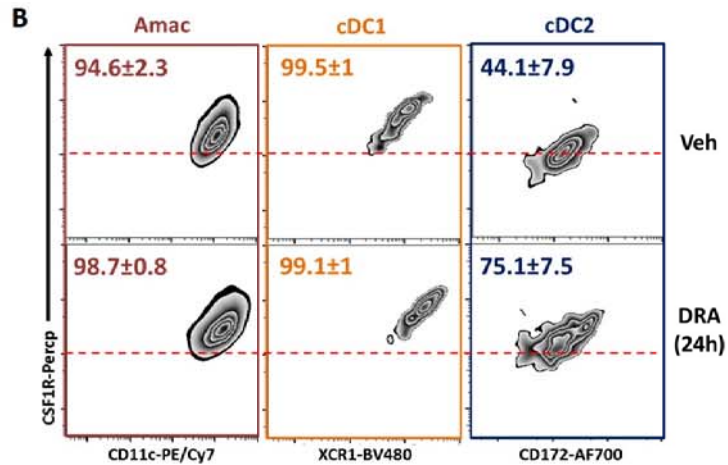

**C** Gating strategy for CSF1R<sup>+</sup> cDCs and alveolar macrophages in mouse BAL

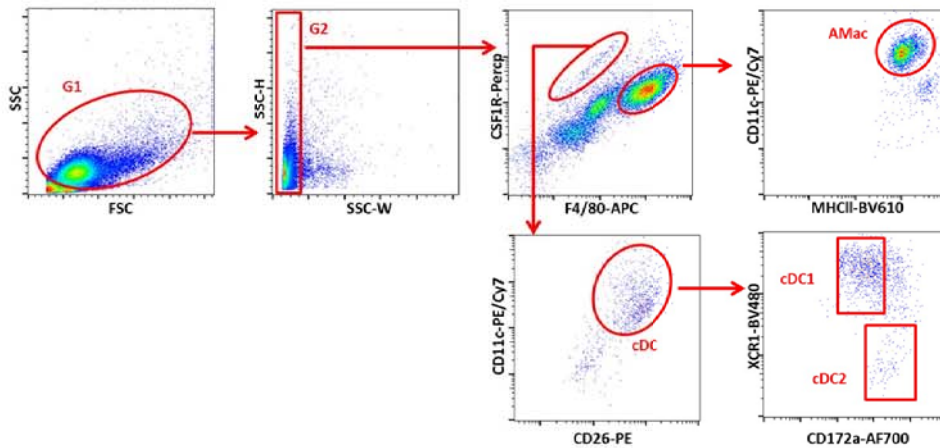

**D** Gating strategy for CSF1R<sup>+</sup> cDCs and alveolar macrophages in mouse mLN

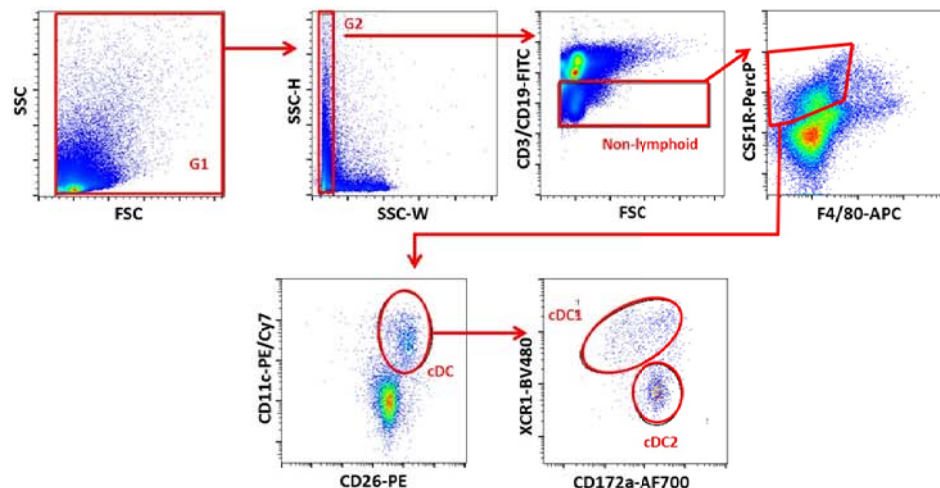

**Figure S3 (related to figure 3). Gating strategies for cDC2**

(A-B) Gating strategy for flow cytometry; mouse BAL cells were separated into alveolar macrophages (Amac), cDC1 and cDC2 and the percentage of CSF1R<sup>+</sup> cells with or without DRA challenges. (C-D) Gating strategy for flow cytometry for detecting CSF1R<sup>+</sup> cDCs in BAL fluids and mediastinal LNs. Amac; alveolar macrophages and cDC; conventional dendritic cells.

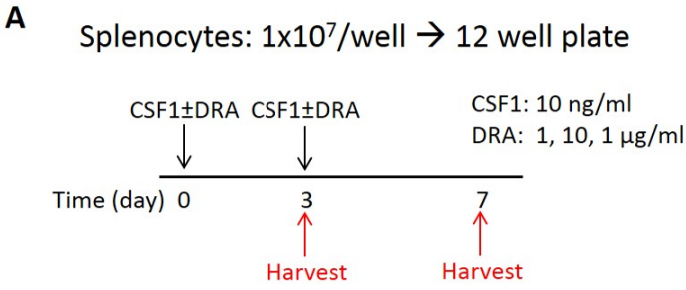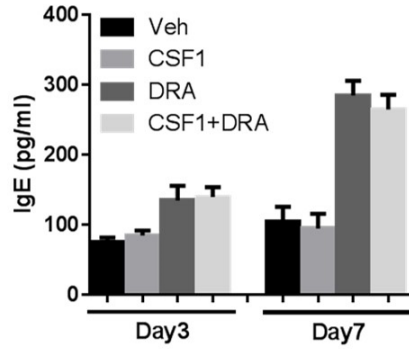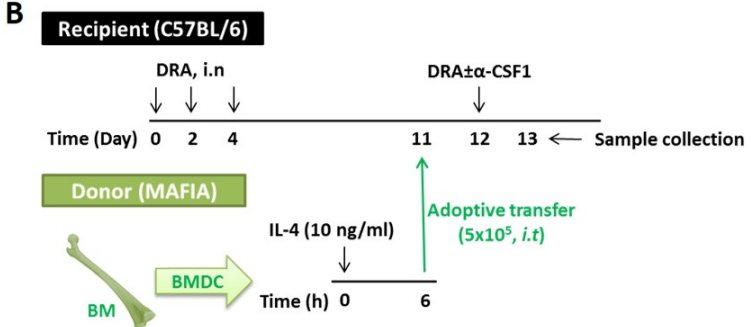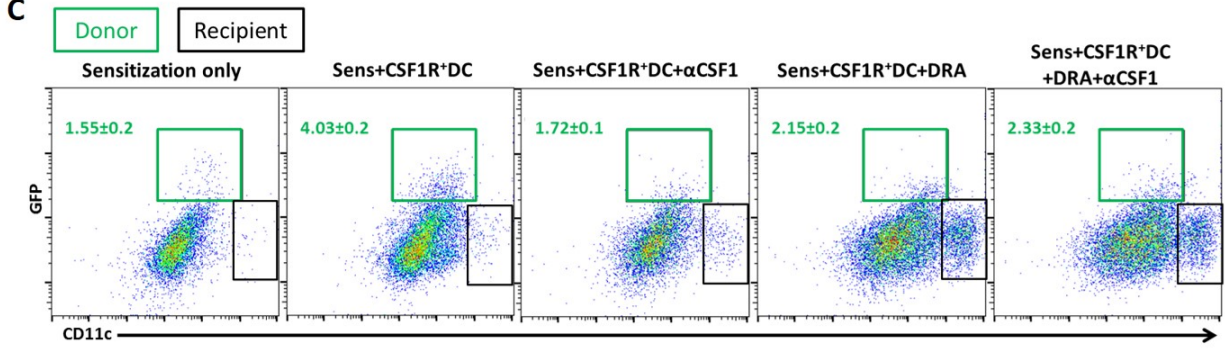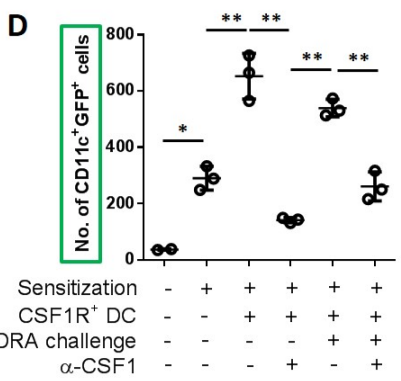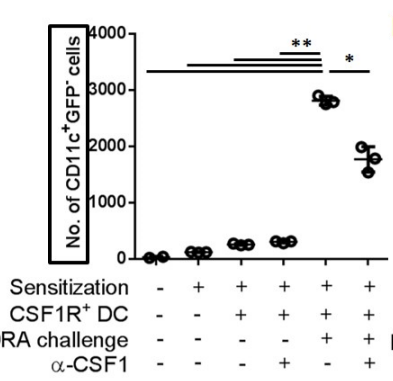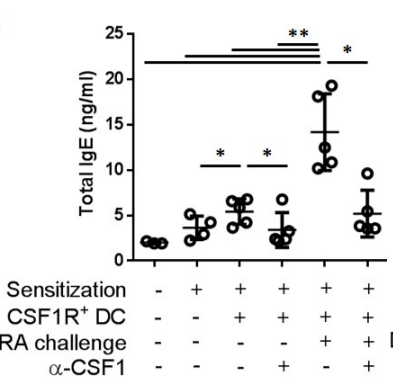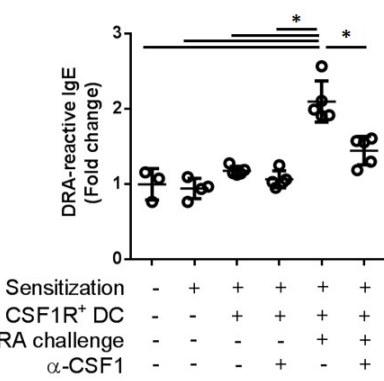

**Figure S4 (related to figure 6A). CSF1 facilitates dendritic cells migration to regional lymph node.**

(A) *Ex vivo* IgE secretion assay with mouse splenocytes. The cells were incubated up to 7 days in various conditions as described in Method. IgE were measured in the media at day 3 and 7. (B) Experimental scheme of adoptive transfer of EGFP<sup>+</sup>DCs. (B-D) Flow gating strategy and the number of donor EGFP<sup>+</sup>DCs (green box) and recipient intrinsic DCs (black box) in mediastinal LNs after DRA challenge with or without anti-CSF1 antibody (100 ng/mouse). (E) Total and DRA-reactive IgE in serum. Data are representative of two (A-E) independent experiments.

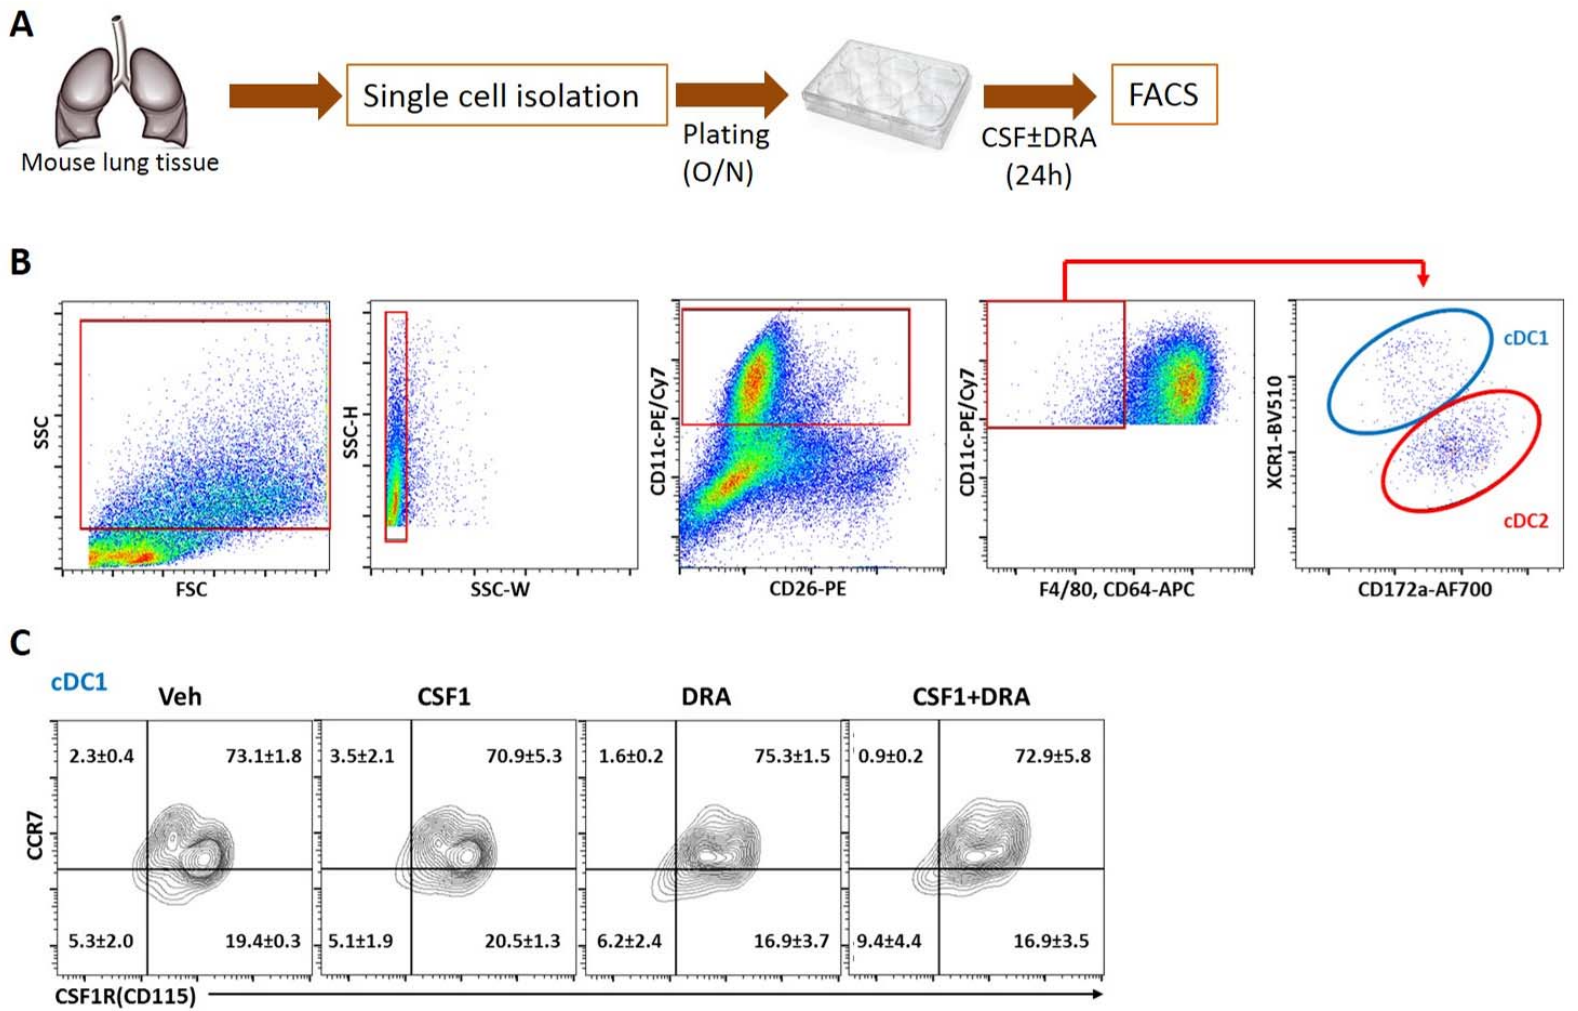

**Figure S5 (related to figure 6B & C). Co-expression of CCR7 & CSF1R in response to allergen**  
 (A) Scheme of *ex vivo* cDC experiments. Single cell suspension from mouse lungs and plated on 6 well plate for O/N and stimulated for another 24h. (B-C) Flow gating strategy and the percentage of CSF1R<sup>+</sup>CCR7<sup>+</sup> population in cDC1 in response to CSF1 and/or DRA (each 5, 50, 5  $\mu$ g/ml). The figure for cDC2 is shown in Fig.6B.

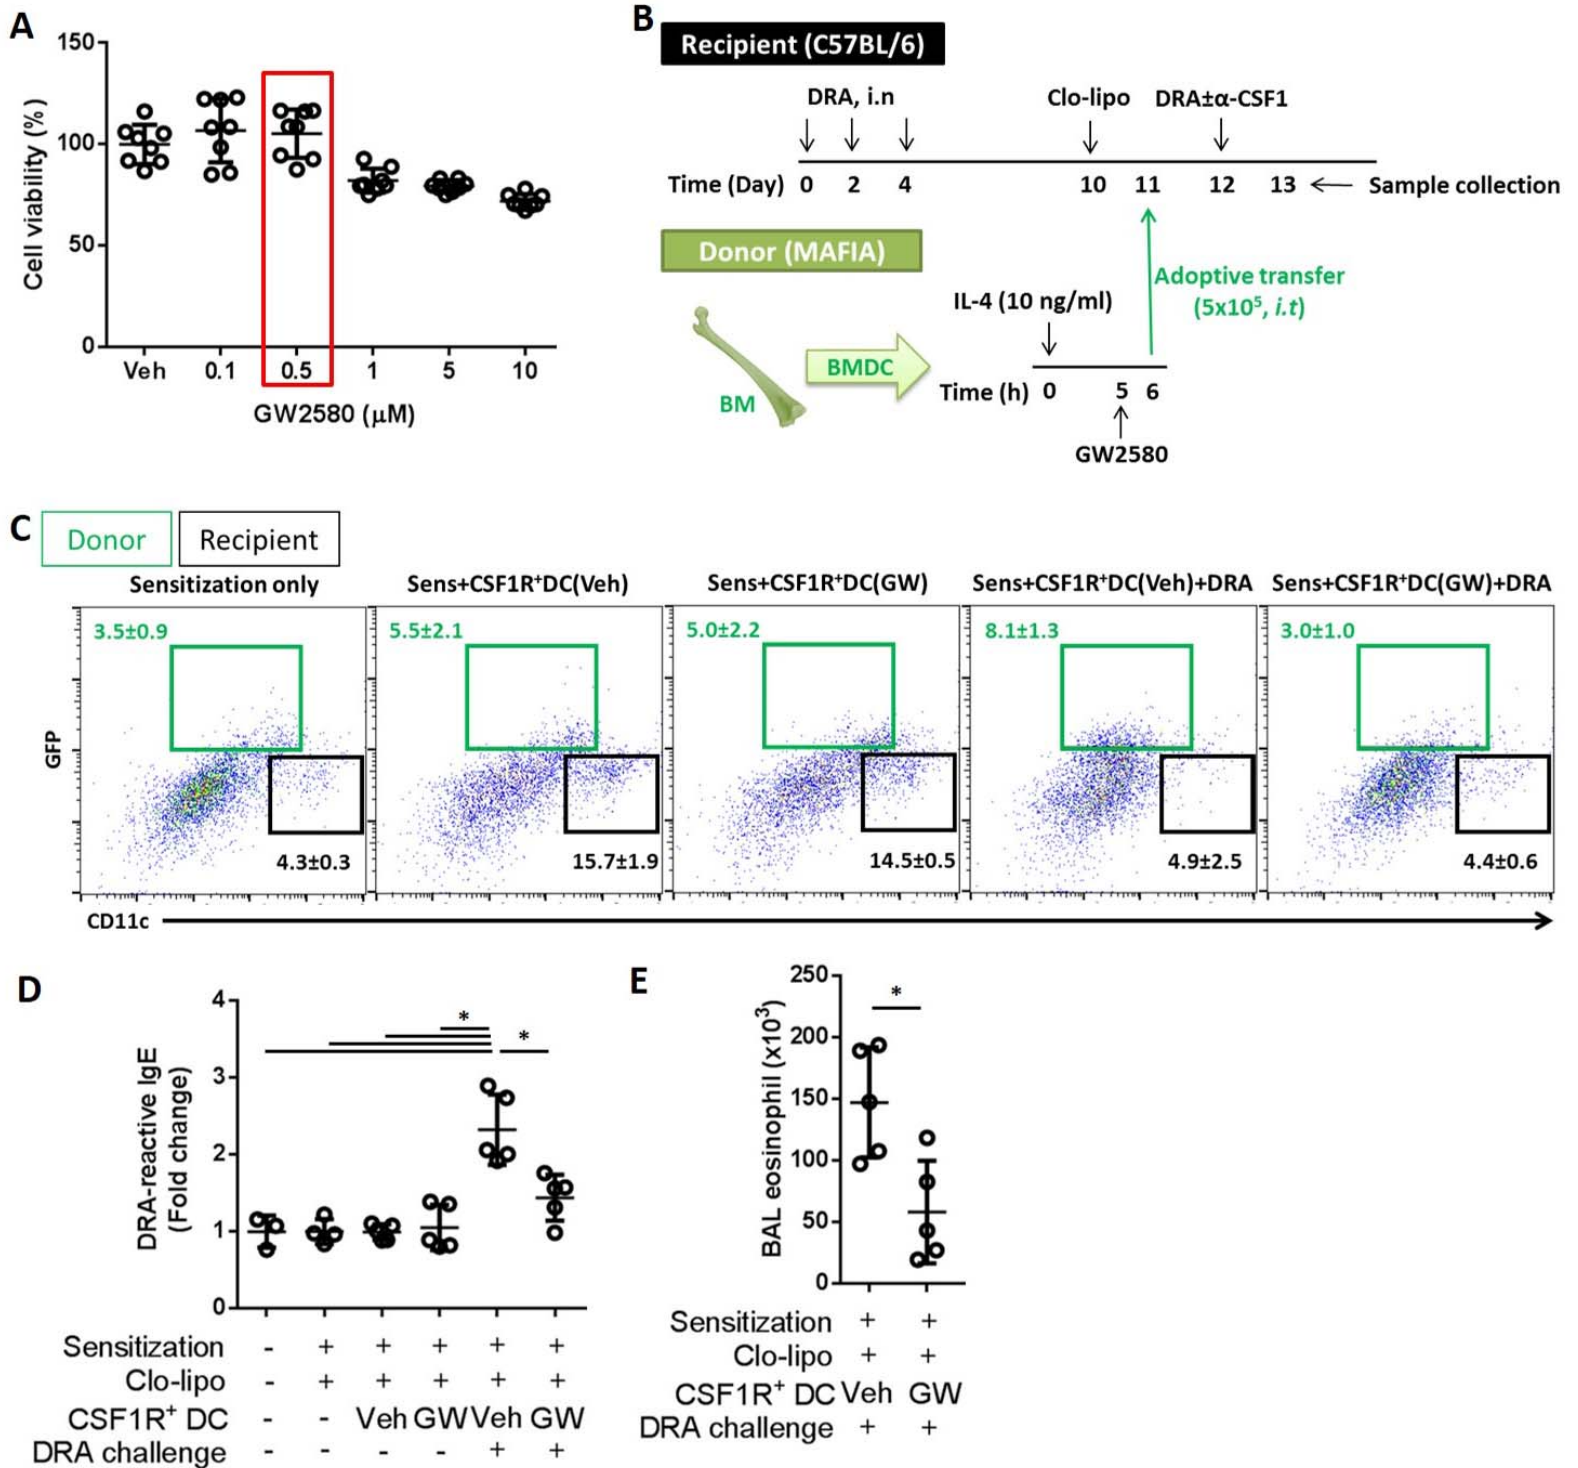

**Figure S6 (related to figure 6D). CSF1R inhibition attenuated dendritic cell migration to regional lymph node.**

(A) BMDC viability after GW2580 treatment for 24h. (B) Experimental scheme of adoptive transfer of EGFP<sup>+</sup>DCs with or without GW2580 pre-treatment. (C) Flow gating strategy and the percentage of donor EGFP<sup>+</sup>DCs (green box) and recipient intrinsic DCs (black box) in mediastinal LNs after DRA challenge. (D-E) DRA-reactive IgE in serum and the number of BAL eosinophils. Data are representative of two (C-E) independent experiments
